# Supplementary material for: What comes after the lockdown? Clustering of ANCA-associated vasculitis: single-centre observation of a spatiotemporal pattern
Source: PubMed Central journal article supplement — Ann Rheum Dis. 2020 Dec 1;80(5):669–71. doi: 10.1136/annrheumdis-2020-219212 (PMC8053319; doi:10.1136/annrheumdis-2020-219212), 2020-12-01

| District       | Inhabitants (2019) | AAV-cases 2020 (n=15) | AAV-cases per 100.000 inhabitants | AAV-cases 2019 (n=11) | AAV-cases 2018 (n=15) |
|----------------|--------------------|-----------------------|-----------------------------------|-----------------------|-----------------------|
| Landeck        | 44 362             | 0                     | 0                                 | 0                     | 0                     |
| Reutte         | 32 670             | 1                     | 3.1                               | 0                     | 1                     |
| Imst           | 60 056             | 0                     | 0                                 | 0                     | 4                     |
| Innsbruck      | 132 110            | 6                     | 4.5                               | 1                     | 4                     |
| Innsbruck Land | 179 318            | 3                     | 1.7                               | 3                     | 4                     |
| Schwaz         | 83 873             | 3                     | 3.6                               | 2                     | 2                     |
| Kufstein       | 109 682            | 2                     | 1.8                               | 3                     | 0                     |
| Kitzbühel      | 63 881             | 0                     | 0                                 | 2                     | 0                     |

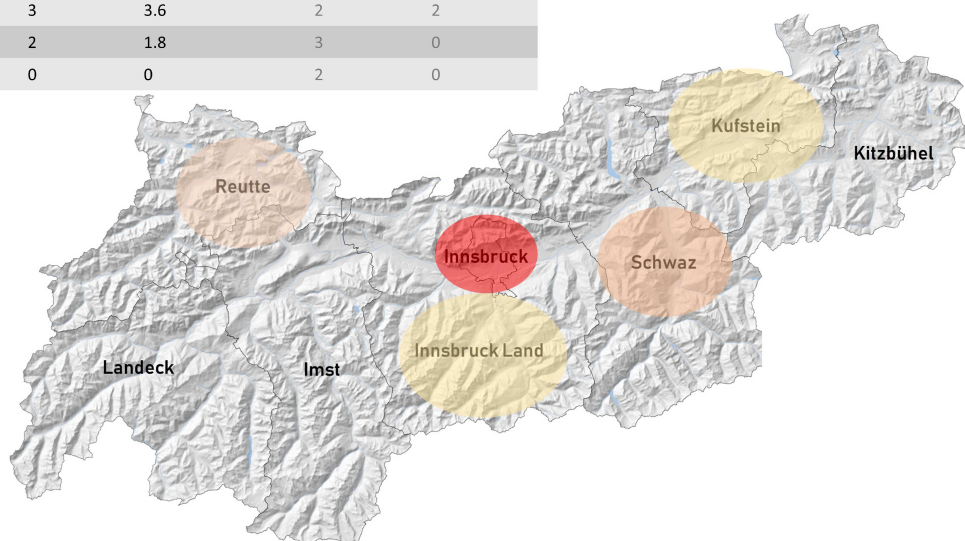

Supplement: annrheumdis-2020-219212supp002.pdf [file annrheumdis-2020-219212supp002.pdf]
