# Supplementary material for: What comes after the lockdown? Clustering of ANCA-associated vasculitis: single-centre observation of a spatiotemporal pattern
Source: PubMed Central journal article supplement — Ann Rheum Dis. 2020 Dec 1;80(5):669–71. doi: 10.1136/annrheumdis-2020-219212 (PMC8053319; doi:10.1136/annrheumdis-2020-219212), 2020-12-01
Supplement: annrheumdis-2020-219212supp004.pdf [file annrheumdis-2020-219212supp004.pdf]

| ID       | consolidation,<br>0=no, 1=yes | ground glass<br>opacity,<br>0=no, 1=yes | reticulation,<br>0=no, 1=yes | honeycombing,<br>0=no, 1=yes | nodular<br>opacities,<br>0=no, 1=yes | nodules with<br>cavitation,<br>0=no, 1=yes | bronchiectasis,<br>0=no, 1=yes | peribronchial<br>thickening,<br>0=no, 1=yes | central<br>airway<br>disease,<br>0=no, 1=yes | emphysema,<br>0=no, 1=yes | usual<br>interstitial<br>pneumonia,<br>0=no, 1=yes | pulmonary<br>hemorrhage,<br>0=no, 1=yes | pleural<br>effusion,<br>0=no, 1=yes | pericardial effusion,<br>0=no, 1=yes | lymphadenopathy,<br>0=no, 1=yes | comment                                                   |
|----------|-------------------------------|-----------------------------------------|------------------------------|------------------------------|--------------------------------------|--------------------------------------------|--------------------------------|---------------------------------------------|----------------------------------------------|---------------------------|----------------------------------------------------|-----------------------------------------|-------------------------------------|--------------------------------------|---------------------------------|-----------------------------------------------------------|
| 1        | 0                             | 1                                       | 0                            | 0                            | 0                                    | 1                                          | 0                              | 0                                           | 1                                            | 0                         | 0                                                  | 0                                       | 0                                   | 0                                    | 0                               | 0 consistent                                              |
| 2        | 0                             | 1                                       | 0                            | 0                            | 0                                    | 0                                          | 0                              | 0                                           | 1                                            | 0                         | 0                                                  | 0                                       | 0                                   | 0                                    | 0                               | 0 consistent                                              |
| 3        | 0                             | 1                                       | 0                            | 0                            | 0                                    | 0                                          | 0                              | 1                                           | 1                                            | 0                         | 0                                                  | 0                                       | 0                                   | 0                                    | 0                               | 0 consistent                                              |
| 4        | 1                             | 0                                       | 1                            | 0                            | 0                                    | 1                                          | 0                              | 0                                           | 0                                            | 0                         | 0                                                  | 0                                       | 1                                   | 1                                    | 0                               | 0 consistent                                              |
| 5        | 0                             | 0                                       | 1                            | 0                            | 0                                    | 0                                          | 0                              | 0                                           | 0                                            | 0                         | 0                                                  | 0                                       | 0                                   | 0                                    | 0                               | pulmonal metastasis, postoperativ scarring, no precise    |
| 6        | 0                             | 0                                       | 0                            | 0                            | 0                                    | 0                                          | 0                              | 0                                           | 0                                            | 1                         | 0                                                  | 0                                       | 0                                   | 0                                    | 0                               | 0 distinction to pulmonary changes due to vasculitis      |
| 7        | 0                             | 1                                       | 0                            | 0                            | 0                                    | 1                                          | 0                              | 0                                           | 0                                            | 0                         | 0                                                  | 1                                       | 0                                   | 0                                    | 0                               | 0 breathing artefacts, subtle changes might be overlooked |
| 8        | 0                             | 0                                       | 1                            | 0                            | 0                                    | 0                                          | 0                              | 0                                           | 0                                            | 1                         | 0                                                  | 0                                       | 0                                   | 0                                    | 0                               | 0 consistent                                              |
| 9        | 0                             | 0                                       | 0                            | 0                            | 0                                    | 0                                          | 0                              | 0                                           | 0                                            | 0                         | 0                                                  | 0                                       | 0                                   | 0                                    | 0                               | 1 consistent, NSIP fibrosis                               |
| 12       | 0                             | 0                                       | 0                            | 0                            | 0                                    | 0                                          | 0                              | 0                                           | 0                                            | 0                         | 0                                                  | 0                                       | 0                                   | 0                                    | 0                               | 0 no pulmonary involvement                                |
| 13       | 1                             | 1                                       | 1                            | 0                            | 0                                    | 0                                          | 0                              | 0                                           | 1                                            | 0                         | 0                                                  | 0                                       | 1                                   | 0                                    | 0                               | 0 no pulmonary involvement                                |
| 14       | 0                             | 1                                       | 1                            | 0                            | 0                                    | 0                                          | 0                              | 0                                           | 0                                            | 0                         | 0                                                  | 0                                       | 0                                   | 0                                    | 0                               | 0 consistent, additional pulmonal congestion              |
| 15       | 0                             | 0                                       | 0                            | 0                            | 0                                    | 0                                          | 0                              | 0                                           | 1                                            | 0                         | 0                                                  | 0                                       | 1                                   | 0                                    | 0                               | 0 consistent                                              |
| 10 (110) | 0                             | 0                                       | 0                            | 0                            | 0                                    | 1                                          | 0                              | 0                                           | 0                                            | 0                         | 1                                                  | 0                                       | 0                                   | 0                                    | 0                               | 1 breathing artefacts, subtle changes might be overlooked |
| 11 (122) | 0                             | 0                                       | 0                            | 0                            | 0                                    | 0                                          | 0                              | 0                                           | 0                                            | 0                         | 0                                                  | 0                                       | 0                                   | 0                                    | 0                               | 0 consistent                                              |
| 12 (122) | 0                             | 0                                       | 0                            | 0                            | 0                                    | 0                                          | 0                              | 0                                           | 0                                            | 0                         | 0                                                  | 0                                       | 0                                   | 0                                    | 0                               | 0 no pulmonary involvement                                |

## Conclusion:

Pat ID 1,2,3,4,7,8,13,14,10 show pulmonary changes consistent with vasculitis involvement.

Pat ID 9,12, 11 have no pulmonary involvement.

Pat ID 6, 15 images are not diagnostic due to breathing artefacts.

Pat ID 5 no distinction between pulmonary metastasis, postoperative changes and vasculitis is possible.

Pat ID 7 radiologic pattern might be mistaken for COVID 19 pneumonia, however typical peripheral and basal distribution is missing.
